# Supplementary material
Source: PubMed Central journal article supplement (PMC1240090)
Supplement: genores_gr.3672305_1.pdf [file genores_gr.3672305_1.pdf]

**Supplemental Table 1.** Gene sets, homology, tandem repeats and ohnologs

| <b>Genome</b>        | <b>Genes</b> | <b>Homologs<sup>a</sup></b> | <b>Singletons<sup>b</sup></b> | <b>Tandems<sup>c</sup></b> | <b>Ohnologs<sup>d</sup></b> |
|----------------------|--------------|-----------------------------|-------------------------------|----------------------------|-----------------------------|
| <i>S. cerevisiae</i> | 5616         | 93.7%                       | 6.3%                          | 81 (1.4%)                  | 551 (19.6%)                 |
| <i>S. castellii</i>  | 5596         | 91.8%                       | 8.2%                          | 77 (1.4%)                  | 599 (21.4%)                 |
| <i>C. glabrata</i>   | 5181         | 93.8%                       | 6.2%                          | 84 (1.6%)                  | 404 (15.6%)                 |
| <i>A. gossypii</i>   | 4716         | 96.0%                       | 4.0%                          | 67 (1.4%)                  | N/A                         |
| <i>K. lactis</i>     | 5327         | 89.0%                       | 11.0%                         | 67 (1.3%)                  | N/A                         |
| <i>K. waltii</i>     | 5230         | 89.2%                       | 10.8%                         | 65 (1.2%)                  | N/A                         |
| <i>S. kluyveri</i>   | 2970         | 89.1%                       | 10.9%                         | 43 (1.5%)                  | N/A                         |

<sup>a</sup> Percentage of genes that are in a pillar with at least one other gene.

<sup>b</sup> Percentage of genes in singleton pillars.

<sup>c</sup> Number and percentage of genes that are in tandem repeats. A tandem repeat is defined as adjacent genes with BLASTP of  $E < 1e-100$ , or with  $E < 1e-10$  provided that the HSP is more than half the length of the shorter sequence, which is in turn at least half the length of the longer sequence.

<sup>d</sup> Number of ohnolog pairs (paralogs arising from a WGD) in the genome, and the percentage of the genome these genes represent.
